Table S1. Constituents of both rodent diets used in this experiment

|                            |                  |
|----------------------------|------------------|
| <b>Amino Acids</b>         |                  |
| Lysine                     | 4.6 g/kg         |
| Methionine and cystine     | 3.5 g/kg         |
| Threonine                  | 4 g/kg           |
| Histidine                  | 3.1 g/kg         |
| Leucine                    | 10 g/kg          |
| Arginine                   | 6.7 g/kg         |
| Valine                     | 5.6 g/kg         |
| Isoleucine                 | 3.8 g/kg         |
| Phenylalanine and Tyrosine | 9.9 g/kg         |
| Tryptophan                 | 2 g/kg           |
| <b>Minerals</b>            |                  |
| Calcium                    | 8.2 g/kg         |
| Phosphorus                 | 6.1 g/kg         |
| Potassium                  | 7.3 g/kg         |
| Iron                       | 137.8 g/kg       |
| Copper                     | 23.7 g/kg        |
| Manganese                  | 101.3 g/kg       |
| Zinc                       | 101.4 g/kg       |
| Selenium                   | 0.1 g/kg         |
| Magnesium                  | 1.8 g/kg         |
| Sodium                     | 0.3 %            |
| <b>Fats</b>                |                  |
| Saturated fat              | 10.1 %           |
| Mono saturated             | 7.5 %            |
| <br>                       |                  |
| % Energy carbohydrate      | 59 %             |
| % Energy protein           | 26 %             |
| % Energy fat               | 16 %             |
| <b>Vitamins</b>            |                  |
| Vitamin A                  | 7,120 iu per kg  |
| Vitamin D                  | 200 iu per kg    |
| Vitamin E                  | 40.192 iu per kg |
| Vitamin K3                 | 5.15 mg/kg       |
| Folic acid                 | 4.016 mg/kg      |
| Niacin                     | 10 mg/kg         |
| Pantothenate               | 11.074 mg/kg     |
| Pyridoxine                 | 6 mg/kg          |
| Riboflavin                 | 5 mg/kg          |
| Thiamine                   | 4 mg/kg          |
| Cobalt                     | 0.25 mg/kg       |
| Iodine                     | 1.9 mg/kg        |
| Biotin                     | 60 ug/kg         |
| Vitamin B12                | 2,136 ug/kg      |

Table S2. The relationship between oxidative stress and time of pairing to birth in reproductive females

|                                             | Time from pairing to birth - all reproductives |       |         | Time from pairing to birth - 2 pups |       |         | Time from pairing to birth - 8 pups |       |         |
|---------------------------------------------|------------------------------------------------|-------|---------|-------------------------------------|-------|---------|-------------------------------------|-------|---------|
|                                             | n                                              | $r_s$ | P-value | n                                   | $r_s$ | P-value | n                                   | $r_s$ | P-value |
| <b>Oxidative stress marker</b>              |                                                |       |         |                                     |       |         |                                     |       |         |
| Protein thiols                              |                                                |       |         |                                     |       |         |                                     |       |         |
| Liver                                       | 28                                             | 0.081 | 0.68    | 13                                  | 0.45  | 0.13    | 15                                  | -0.24 | 0.39    |
| Heart                                       | 31                                             | 0.22  | 0.24    | 15                                  | 0.11  | 0.70    | 16                                  | 0.29  | 0.28    |
| Muscle                                      | 31                                             | 0.14  | 0.43    | 14                                  | 0.04  | 0.89    | 17                                  | 0.11  | 0.67    |
| Proportion of oxidised to total glutathione |                                                |       |         |                                     |       |         |                                     |       |         |
| Liver                                       | 33                                             | 0.14  | 0.43    | 15                                  | 0.36  | 0.19    | 18                                  | 0.004 | 0.10    |
| Heart                                       | 33                                             | 0.15  | 0.41    | 15                                  | 0.08  | 0.78    | 17                                  | 0.17  | 0.53    |
| Muscle                                      | 32                                             | 0.18  | 0.32    | 15                                  | 0.33  | 0.23    | 17                                  | -0.02 | 0.93    |
| Total glutathione                           |                                                |       |         |                                     |       |         |                                     |       |         |
| Liver                                       | 28                                             | 0.10  | 0.62    | 13                                  | 0.39  | 0.19    | 15                                  | -0.11 | 0.70    |
| Heart                                       | 33                                             | 0.23  | 0.20    | 15                                  | 0.31  | 0.25    | 18                                  | 0.21  | 0.41    |
| Muscle                                      | 31                                             | 0.29  | 0.11    | 14                                  | -0.10 | 0.72    | 17                                  | 0.51  | 0.04    |
| Additional liver markers                    |                                                |       |         |                                     |       |         |                                     |       |         |
| Carbonyls                                   | 23                                             | -0.33 | 0.12    | 12                                  | -0.38 | 0.23    | 11                                  | -0.33 | 0.32    |
| Superoxide dismutase                        | 31                                             | -0.14 | 0.52    | 12                                  | 0.14  | 0.68    | 12                                  | -0.31 | 0.32    |
| Catalase                                    | 31                                             | -0.18 | 0.35    | 14                                  | -0.34 | 0.23    | 17                                  | 0.02  | 0.94    |
| <b>Mitochondrial marker</b>                 |                                                |       |         |                                     |       |         |                                     |       |         |
| Citrate synthase                            | 33.00                                          | -0.02 | 0.9     | 15                                  | -0.46 | 0.08    | 18                                  | 0.22  | 0.37    |
| Aconitase/citrate synthase                  | 33                                             | 0.3   | 0.1     | 15                                  | 0.54  | 0.036   | 18                                  | 0.005 | 0.98    |
